# Supplementary material
Source: publisher site journal article supplement (https://www.dovepress.com/article/424497)
Supplement: Supplementary file 1 [file get_supplementary_file.php]

## Supplementary material

ORIGINAL RESEARCH

Bogart et al

**Outcomes following initiation of triple therapy with fluticasone furoate/umeclidinium/vilanterol versus multiple-inhaler triple therapy among Medicare Advantage with Part D beneficiaries and those commercially enrolled for health care insurance in the United States**Michael Bogart1*, Lindsay GS Bengtson2*, Mary G Johnson2, Scott H Bunner2*, Noelle N Gronroos2, Kristi K DiRocco3

1US Value Evidence & Outcomes, R&D US, GSK, Research Triangle Park, NC, USA; 2Health Economics and Outcomes Research, Optum, Eden Prairie, MN, USA; 3US Medical Affairs, GSK, Collegeville, PA, USA
*At the time of the study

**Correspondence:**
Kristi K DiRocco, US Medical Affairs, GSK, 1250 S. Collegeville Rd, Collegeville, PA 19426, USA
Tel 610-412-7175
Email [kristi.k.dirocco@gsk.com](mailto:kristi.k.dirocco@gsk.com)

### **Supplementary Table 1.** Weighted baseline characteristics for commercial enrollees

| **Demographic characteristics** | **FF/UMEC/VI initiators (N=821)** | **MITT initiators (N=1,893)** | **Robust standardized difference (%)** | **Robust p-value** |
| --- | --- | --- | --- | --- |
| **Age (continuous), mean (SD)** | 61.74 (9.48) | 61.60 (9.24) | 1.48 | 0.784 |
| **Age group, n (%)** | | | | |
| 40–49 | 69 (8.37) | 137 (7.23) | 4.25 | 0.444 |
| 50–59 | 282 (34.31) | 657 (34.73) | -0.90 | 0.856 |
| 60–64 | 241 (29.38) | 571 (30.18) | -1.76 | 0.714 |
| 65–69 | 91 (11.09) | 222 (11.75) | -2.08 | 0.684 |
| 70–74 | 53 (6.50) | 109 (5.78) | 3.00 | 0.625 |
| 75+ | 85 (10.35) | 195 (10.32) | 0.11 | 0.983 |
| **Sex, n (%)** | | | | |
| Female | 419 (51.05) | 970 (51.25) | -0.40 | 0.937 |
| Male | 402 (48.95) | 923 (48.75) | 0.40 | 0.937 |
| **Race/ethnicity, n (%)** | | | | |
| White | 576 (70.12) | 1,342 (70.89) | -1.69 | 0.741 |
| African American/Black | 66 (8.04) | 146 (7.70) | 1.23 | 0.816 |
| Asian | 8 (1.00) | 24 (1.24) | -2.29 | 0.546 |
| Hispanic | 41 (4.95) | 87 (4.57) | 1.78 | 0.722 |
| Unknown | 131 (15.90) | 295 (15.59) | 0.83 | 0.872 |
| **Comorbidities,a n (%)** | | | | |
| Hypertension | 537 (65.36) | 1,235 (65.23) | 0.27 | 0.957 |
| Other lower respiratory disease | 693 (84.35) | 1,551 (81.95) | 6.44 | 0.170 |
| Disorders of lipid metabolism | 435 (53.02) | 1,076 (56.86) | -7.73 | 0.127 |
| Diseases of the heart | 480 (58.40) | 1,104 (58.34) | 0.14 | 0.978 |
| Other nutritional, endocrine, and metabolic disorders | 417 (50.78) | 931 (49.18) | 3.20 | 0.526 |
| Respiratory infections | 513 (62.47) | 1,163 (61.44) | 2.12 | 0.673 |
| Diseases of the urinary system | 295 (35.89) | 665 (35.11) | 1.63 | 0.750 |
| Non-traumatic joint disorders | 303 (36.96) | 747 (39.47) | -5.15 | 0.320 |
| Other connective tissue disease | 336 (40.91) | 772 (40.76) | 0.30 | 0.953 |
| Diabetes mellitus without complication | 286 (34.80) | 640 (33.79) | 2.12 | 0.674 |
| Eye disorders | 231 (28.20) | 584 (30.83) | -5.79 | 0.269 |
| Spondylosis, intervertebral disc disorders, other back problems | 294 (35.81) | 737 (38.92) | -6.44 | 0.204 |
| Diseases of arteries, arterioles, and capillaries | 287 (35.01) | 588 (31.05) | 8.42 | 0.094 |
| Other nervous system disorders | 275 (33.44) | 601 (31.74) | 3.62 | 0.479 |
| Screening and history of mental health and substance abuse codes | 300 (36.52) | 688 (36.35) | 0.37 | 0.942 |
| Upper gastrointestinal disorders | 300 (36.52) | 656 (34.64) | 3.92 | 0.440 |
| Substance-related disorders | 358 (43.59) | 792 (41.83) | 3.54 | 0.481 |
| Other skin disorders | 226 (27.58) | 585 (30.92) | -7.34 | 0.162 |
| Other upper respiratory disease | 269 (32.73) | 707 (37.35) | -9.69 | 0.053 |
| Asthma | 307 (37.45) | 739 (39.04) | -3.28 | 0.523 |
| **Medication, n (%)** | | | | |
| **Maintenance medication, n (%)** | | | | |
| ICS | 97 (11.81) | 193 (10.22) | 5.10 | 0.389 |
| LABA | 8 (1.00) | 32 (1.68) | -5.93 | 0.243 |
| ICS/LABA combination | 366 (44.54) | 851 (44.94) | -0.79 | 0.876 |
| LAMA | 172 (20.96) | 366 (19.34) | 4.02 | 0.503 |
| LAMA/LABA combination | 89 (10.84) | 217 (11.47) | -2.01 | 0.640 |
| Methylxanthines | 9 (1.08) | 32 (1.68) | -5.20 | 0.273 |
| Methylxanthines combinations | 0 (0.00) | 0 (0.00) | – | – |
| Phosphodiesterase-4 enzyme inhibitor | 5 (0.67) | 13 (0.67) | -0.06 | 0.990 |
| **Rescue medication, n (%)** | | | | |
| SABA | 607 (73.89) | 1,442 (76.16) | -5.26 | 0.272 |
| SAMA | 25 (3.05) | 67 (3.54) | -2.77 | 0.673 |
| SAMA/SABA | 150 (18.32) | 372 (19.66) | -3.42 | 0.503 |
| **Corticosteroids, n (%)** | | | | |
| Oral corticosteroids | 567 (69.04) | 1,272 (67.22) | 3.91 | 0.425 |
| Injectable corticosteroids | 249 (30.37) | 609 (32.17) | -3.89 | 0.446 |
| **COPD-guideline-recommended antibiotics,b n (%)** | 623 (75.91) | 1,444 (76.30) | -0.90 | 0.856 |

Index pharmacy claims excluded from baseline period.

**Notes:** aComorbidities were defined using the Clinical Classification Software for ICD-9-CM/ICD-10-CM. Agency for Healthcare Research and Quality, Rockville, MD. [www.hcup-us.ahrq.gov/toolssoftware/ccs/ccs.jsp](http://www.hcup-us.ahrq.gov/toolssoftware/ccs/ccs.jsp); [www.hcup-us.ahrq.gov/toolssoftware/ccs10/ccs10.jsp](http://www.hcup-us.ahrq.gov/toolssoftware/ccs10/ccs10.jsp). bThe American Thoracic Society (2017) and Global Initiative for Chronic Obstructive Lung Disease (2020) guidelines recommend that antibiotics for acute exacerbation of chronic bronchitis be selected based on local sensitivity patterns. For more specific recommendations, The Sanford Guide to Antimicrobial Therapy (2020) was referenced.

**Abbreviations:** COPD, chronic obstructive pulmonary disease; FF/UMEC/VI, fluticasone furoate/umeclidinium/vilanterol; ICS, inhaled corticosteroids; LABA, long-acting beta-agonist; LAMA, long-acting muscarinic antagonist; MITT, multiple-inhaler triple therapy; SABA, short-acting beta-agonist; SAMA, short-acting muscarinic antagonist; SD, standard deviation.

### **Supplementary Table 2.** Weighted COPD exacerbations for commercial enrollees

|  | **Baseline** | | | | **Follow-up** | | |
| --- | --- | --- | --- | --- | --- | --- | --- |
| **FF/UMEC/VI initiators (N=821)** | **MITT initiators (N=1,893)** | **Robust standardized difference (%)** | **Robust p-value** | **FF/UMEC/VI initiators (N=821)** | **MITT initiators (N=1,893)** | **Robust p-value** |
| **Any COPD exacerbation,a-c mean (SD)** | | | | | | | |
| Annual rate of COPD exacerbation | 1.04 (1.37) | 1.11 (1.30) | -5.10 | 0.325 | 0.80 (1.27) | 0.84 (1.28) | 0.594 |
| Total duration (days) of COPD exacerbation(s) | 19.13 (27.20) | 19.99 (24.44) | -3.35 | 0.514 | 14.28 (25.05) | 15.32 (24.96) | 0.487 |
| Average cost of COPD exacerbation(s) ($) | 5,469.72 (59,577.40) | 5,003.44 (23,333.22) | 1.03 | 0.816 | 2,205.06 (16,523.11) | 3,272.95 (19,335.07) | 0.128 |
| ≥1 COPD exacerbation, **n (%)** | 455 (55.43) | 1,135 (59.96) | -9.18 | 0.068 | 362 (44.15) | 868 (45.87) | 0.495 |
| Annual rate of COPD exacerbation among patients with ≥1 COPD exacerbation | 1.88 (1.34) | 1.86 (1.20) | 2.25 | 0.748 | 1.82 (1.35) | 1.84 (1.32) | 0.897 |
| Total duration (days) of COPD exacerbation(s) among patients with ≥1 COPD exacerbation | 34.51 (28.35) | 33.34 (23.47) | 4.47 | 0.510 | 32.35 (28.95) | 33.41 (27.46) | 0.701 |
| Average cost of COPD exacerbation(s) among patients with ≥1 COPD exacerbation ($) | 9,867.65 (79,788.90) | 8,344.64 (29,671.67) | 2.53 | 0.669 | 4,994.96 (24,606.95) | 7,134.99 (28,069.28) | 0.166 |
| **Severe COPD exacerbation,b mean (SD)** | | | | | | | |
| Annual rate of severe COPD exacerbation | 0.18 (0.45) | 0.21 (0.51) | -5.21 | 0.298 | 0.13 (0.44) | 0.16 (0.48) | 0.266 |
| Total duration (days) of severe COPD exacerbation(s) | 4.86 (15.54) | 5.03 (13.25) | -1.21 | 0.803 | 3.31 (12.93) | 3.97 (13.80) | 0.416 |
| Average cost of severe COPD exacerbation(s) ($) | 7,236.81 (62,655.18) | 6,046.89 (26,882.12) | 2.47 | 0.594 | 3,104.46 (27,834.04) | 3,988.63 (21,969.54) | 0.409 |
| ≥1 severe COPD exacerbation, **n (%)** | 130 (15.78) | 329 (17.37) | -4.29 | 0.434 | 77 (9.35) | 225 (11.89) | 0.103 |
| Annual rate of severe COPD exacerbation among patients with ≥1 severe COPD exacerbation | 1.16 (0.41) | 1.19 (0.56) | -7.77 | 0.473 | 1.34 (0.66) | 1.31 (0.66) | 0.858 |
| Total duration (days) of severe COPD exacerbation(s) among patients with ≥1 severe COPD exacerbation | 30.78 (27.17) | 28.95 (17.83) | 7.94 | 0.448 | 35.41 (25.63) | 33.36 (24.98) | 0.689 |
| Average cost of severe COPD exacerbation(s) among patients with ≥1 severe COPD exacerbation ($) | 45,862.71 (152,660.86) | 34,802.32 (56,253.61) | 9.61 | 0.409 | 33,198.97 (85,850.29) | 33,553.99 (55,490.58) | 0.972 |
| **Moderate COPD exacerbation,c mean (SD)** | | | | | | | |
| Annual rate of moderate COPD exacerbation | 0.86 (1.22) | 0.91 (1.20) | -3.56 | 0.481 | 0.68 (1.07) | 0.69 (1.14) | 0.890 |
| Total duration (days) of moderate COPD exacerbation(s) | 14.27 (20.57) | 14.96 (20.61) | -3.35 | 0.504 | 10.97 (18.24) | 11.36 (19.56) | 0.690 |
| Average cost of moderate COPD exacerbation(s) ($) | 343.77 (952.58) | 427.27 (1,534.98) | -6.54 | 0.128 | 274.07  (891.21) | 256.86  (966.83) | 0.742 |
| ≥1 moderate COPD exacerbation, **n (%)** | 403 (49.03) | 968 (51.15) | -4.24 | 0.401 | 331 (40.27) | 759 (40.10) | 0.944 |
| Annual rate of moderate COPD exacerbation among patients with ≥1 moderate COPD exacerbation | 1.76 (1.21) | 1.77 (1.13) | -0.98 | 0.892 | 1.69 (1.08) | 1.71 (1.21) | 0.771 |
| Total duration (days) of moderate COPD exacerbation(s) among patients with ≥1 moderate COPD exacerbation | 29.11 (20.77) | 29.25 (20.32) | -0.70 | 0.921 | 27.24 (19.58) | 28.33 (21.77) | 0.519 |
| Average cost of moderate COPD exacerbation(s) among patients with ≥1 moderate COPD exacerbation ($) | 701.16 (1,265.62) | 835.37 (2,065.83) | -7.83 | 0.189 | 680.55 (1,303.32) | 640.62 (1,444.65) | 0.740 |

**Notes:** Follow-up period does not include the index date. aExacerbations are classified according to the highest severity contributing event. bSevere exacerbations are defined as a hospitalization with a primary diagnosis code of COPD. cModerate exacerbations are defined as an emergency room, physician office, or hospital outpatient visit with a primary diagnosis code of COPD accompanied by an antibiotic or systemic corticosteroid dispensing within 5 days.

**Abbreviations:** COPD, chronic obstructive pulmonary disease; FF/UMEC/VI, fluticasone furoate/umeclidinium/vilanterol; MITT, multiple-inhaler triple therapy; SD, standard deviation.

### **Supplementary Table 3.** Weighted follow-up adherence to triple therapy for commercial enrollees

|  | **FF/UMEC/VI  (N=821)** | **MITT  (N=1,893)** | **Robust p-value** |
| --- | --- | --- | --- |
| **PDC,a mean (SD)** | 0.63 (0.32) | 0.41 (0.31) | <0.001 |
| **PDC ≥0.8, n (%)** | 358 (43.64) | 338 (17.86) | <0.001 |
| **Discontinuation of index medication,b n (%)** | 374 (45.61) | 1,459 (77.07) | <0.001 |

**Notes:** Follow-up period includes index pharmacy claims. aPDC defined as number of overlapping days on which medication was available divided by the number of days between the index date through the end of the follow-up period. bTime to discontinuation defined as time from the index date to treatment gap of ≥60 days after the run out of days’ supply of the last prescription filled prior to the gap in therapy.

**Abbreviations:** FF/UMEC/VI, fluticasone furoate/umeclidinium/vilanterol; MITT, multiple-inhaler triple therapy; PDC, proportion of days covered; SD, standard deviation.

### **Supplementary Table 4.** Weighted all-cause HCRU for commercial enrollees

|  | **Baseline** | | | | **Follow-up** | | |
| --- | --- | --- | --- | --- | --- | --- | --- |
| **FF/UMEC/VI  (N=821)** | **MITT  (N=1,893)** | **Robust standardized difference (%)** | **Robust p-value** | **FF/UMEC/VI  (N=821)** | **MITT (N=1,893)** | **Robust p-value** |
| **All-cause HCRU, n (%)** | | | | | | |  |
| Ambulatory visits | 814 (99.20) | 1,884 (99.55) | -4.39 | 0.496 | 812 (98.91) | 1,880 (99.32) | 0.268 |
| Office visits | 814 (99.20) | 1,868 (98.68) | 5.07 | 0.529 | 805 (98.01) | 1,872 (98.91) | 0.140 |
| Outpatient visits | 677 (82.48) | 1,577 (83.32) | -2.24 | 0.639 | 654 (79.63) | 1,547 (81.74) | 0.255 |
| Emergency room visits | 410 (49.90) | 945 (49.91) | -0.02 | 0.997 | 364 (44.32) | 880 (46.51) | 0.388 |
| Inpatient stays | 214 (26.01) | 518 (27.36) | -3.04 | 0.568 | 174 (21.15) | 423 (22.34) | 0.581 |
| Pharmacy use | 819 (99.80) | 1,886 (99.61) | 3.51 | 0.354 | 821 (100) | 1,893 (100) | – |
| **All-cause HCRU counts, mean (SD)** | | | | | | | |
| Ambulatory visits | 25.13 (22.92) | 24.59 (20.38) | 2.48 | 0.699 | 26.40 (28.11) | 27.74 (24.03) | 0.425 |
| Office visits | 17.04 (15.91) | 16.17 (13.96) | 5.77 | 0.341 | 18.32 (21.56) | 18.32 (16.25) | 0.995 |
| Outpatient visits | 8.26 (10.23) | 8.66 (10.91) | -3.84 | 0.526 | 8.28 (10.57) | 9.72 (13.05) | 0.026 |
| Emergency room visits | 1.59 (4.71) | 1.41 (3.19) | 4.50 | 0.510 | 1.58 (4.69) | 1.46 (3.77) | 0.682 |
| Inpatient stays | 0.36 (0.70) | 0.38 (0.75) | -3.13 | 0.544 | 0.31 (0.75) | 0.34 (0.78) | 0.548 |
| Inpatient daysa |  |  |  |  | 11.95 (27.61) | 11.62 (18.33) | 0.872 |
| Pharmacy fills | 50.55 (38.57) | 48.21 (36.07) | 6.27 | 0.270 | 58.56 (43.64) | 60.83 (40.61) | 0.363 |

**Notes:** Follow-up period does not include the index date. aSubset of patients with an inpatient stay.

**Abbreviations:** FF/UMEC/VI, fluticasone furoate/umeclidinium/vilanterol; HCRU, health care resource utilization; MITT, multiple-inhaler triple therapy; SD, standard deviation.

### **Supplementary Table 5.** Weighted COPD-related HCRU for commercial enrollees

|  | **Baseline** | | | | **Follow-up** | | |
| --- | --- | --- | --- | --- | --- | --- | --- |
| **FF/UMEC/VI (N=821)** | **MITT (N=1,893)** | **Robust standardized difference (%)** | **Robust p-value** | **FF/UMEC/VI (N=821)** | **MITT (N=1,893)** | **Robust p-value** |
| **COPD-related utilization, n (%)** | | | | | | | |
| Ambulatory visits | 641 (78.04) | 1,464 (77.32) | 1.72 | 0.739 | 587 (71.52) | 1,421 (75.06) | 0.107 |
| Office visits | 583 (71.05) | 1,340 (70.80) | 0.54 | 0.915 | 546 (66.46) | 1,268 (66.99) | 0.823 |
| Outpatient visits | 289 (35.22) | 685 (36.17) | -2.00 | 0.696 | 247 (30.07) | 678 (35.81) | 0.021 |
| Emergency room visits | 103 (12.51) | 259 (13.66) | -3.43 | 0.514 | 83 (10.13) | 190 (10.03) | 0.948 |
| Inpatient stay | 102 (12.47) | 251 (13.27) | -2.39 | 0.681 | 58 (7.08) | 185 (9.77) | 0.065 |
| Pharmacy use | 783 (95.42) | 1,802 (95.20) | 1.07 | 0.793 | 821 (100) | 1,893 (100) | – |
| **COPD-related counts, mean (SD)** | | | | | | | |
| Ambulatory visits | 2.94 (3.33) | 2.82 (3.22) | 3.38 | 0.527 | 2.79 (3.85) | 3.09 (4.08) | 0.244 |
| Office visits | 2.10 (2.37) | 1.97 (2.26) | 5.49 | 0.285 | 2.00 (2.48) | 2.06 (2.58) | 0.666 |
| Outpatient visits | 0.85 (1.73) | 0.88 (1.83) | -1.84 | 0.730 | 0.81 (2.01) | 1.05 (2.53) | 0.092 |
| Emergency room visits | 0.17 (0.58) | 0.20 (0.60) | -4.36 | 0.365 | 0.19 (0.86) | 0.17 (0.64) | 0.555 |
| Inpatient stays | 0.14 (0.40) | 0.16 (0.45) | -3.86 | 0.465 | 0.11 (0.53) | 0.13 (0.47) | 0.620 |
| Inpatient daysa | 0.97 (4.04) | 1.22 (5.74) | -5.08 | 0.292 | 17.40 (44.25) | 12.40 (19.81) | 0.280 |
| Pharmacy fills | 9.93 (8.74) | 10.08 (9.28) | -1.67 | 0.757 | 13.57 (8.69) | 18.07 (11.88) | <0.001 |

**Notes:** Follow-up period does not include the index date. aSubset of patients with an inpatient stay.

**Abbreviations:** COPD, chronic obstructive pulmonary disease; FF/UMEC/VI, fluticasone furoate/umeclidinium/vilanterol; HCRU, health care resource utilization; MITT, multiple-inhaler triple therapy; SD, standard deviation.

### **Supplementary Table 6.** Weighted all-cause HCRU costs for MAPD beneficiaries

|  | **Baseline** | | | | **Follow-up** | | |
| --- | --- | --- | --- | --- | --- | --- | --- |
| **FF/UMEC/VI (N=4,659)** | **MITT (N=9,845)** | **Robust standardized difference (%)** | **Robust p-value** | **FF/UMEC/VI (N=4,659)** | **MITT (N=9,845)** | **Robust p-value** |
| **All-cause health care costs ($),a mean (SD)** | | | | | | | |
| Total (medical + pharmacy) costs | 26,336.93 (36,950.54) | 27,102.26 (36,955.38) | -2.07 | 0.314 | 29,012.99 (35,224.09) | 33,109.19 (40,942.14) | <0.001 |
| Medical costs | 18,138.85 (29,031.19) | 18,555.26 (31,543.82) | -1.37 | 0.510 | 17,958.75 (27,230.96) | 20,267.27 (33,949.00) | <0.001 |
| Ambulatory | 6,526.52 (9,153.70) | 6,415.85 (10,305.90) | 1.14 | 0.554 | 6,837.52 (9,448.24) | 7,372.15 (12,278.61) | 0.008 |
| Office visits | 2,792.33 (4,453.38) | 2,667.31 (5,521.08) | 2.49 | 0.156 | 2,709.85 (4,289.91) | 2,830.03 (7,521.83) | 0.239 |
| Outpatient visits | 3,734.20 (7,472.32) | 3,748.53 (8,034.54) | -0.18 | 0.926 | 4,127.67 (7,903.41) | 4,542.12 (9,063.06) | 0.012 |
| Emergency room visits | 1,384.75 (2,943.58) | 1,533.89 (3,345.75) | -4.73 | 0.020 | 1,491.88 (3,388.59) | 1,612.13 (3,814.91) | 0.094 |
| Inpatient stays | 8,999.56 (23,828.22) | 9,403.63 (26,550.28) | -1.60 | 0.444 | 8,219.25 (20,851.68) | 9,867.48 (26,712.45) | <0.001 |
| Other medical costsb | 1,228.01 (3,096.05) | 1,201.90 (4,020.17) | 0.73 | 0.658 | 1,410.10 (4,276.93) | 1,415.52 (3,736.63) | 0.937 |
| Pharmacy costs | 8,198.08 (20,941.18) | 8,547.00 (16,604.86) | -1.85 | 0.358 | 11,054.25 (20,518.15) | 12,841.92 (19,544.35) | <0.001 |

**Notes:** Follow-up period does not include the index date. aCosts are adjusted using the annual medical care component of the Consumer Price Index to reflect inflation to year 2020. bOther medical costs may include services like independent laboratory, home health, durable medical equipment, etc. US Department of Labor, Bureau of Labor Statistics. Consumer Price Index. Medical Care. Series ID: CUUR0000SAM. Washington, DC: US Department of Labor, Bureau of Labor Statistics. http://data.bls.gov/cgi-bin/surveymost?cu.

**Abbreviations:** FF/UMEC/VI, fluticasone furoate/umeclidinium/vilanterol; HCRU, health care resource utilization; MAPD, Medicare Advantage with Part D; MITT, multiple-inhaler triple therapy; SD, standard deviation.

### **Supplementary Table 7.** Weighted all-cause HCRU costs for commercial enrollees

|  | **Baseline** | | | | **Follow-up** | | |
| --- | --- | --- | --- | --- | --- | --- | --- |
| **FF/UMEC/VI (N=821)** | **MITT (N=1,893)** | **Robust standardized difference (%)** | **Robust p-value** | **FF/UMEC/VI (N=821)** | **MITT (N=1,893)** | **Robust p-value** |
| **All-cause health care costs ($),a mean (SD)** | | | | | | | |
| Total (medical + pharmacy) costs | 33,926.52 (130,018.45) | 31,156.71 (59,756.65) | 2.74 | 0.549 | 33,555.49 (59,528.89) | 37,781.94 (61,009.97) | 0.172 |
| Medical costs | 27,205.75 (129,370.16) | 24,158.30 (54,550.75) | 3.07 | 0.502 | 22,080.18 (55,036.35) | 25,603.32 (54,545.74) | 0.218 |
| Ambulatory | 9,486.55 (18,778.95) | 10,640.04 (21,278.85) | -5.75 | 0.241 | 11,807.97 (30,428.65) | 13,038.83  (26,475.67) | 0.478 |
| Office visits | 3,174.39 (6,010.81) | 3,164.56 (7,136.68) | 0.15 | 0.976 | 3,934.54 (14,395.42) | 3,835.59  (8,526.45) | 0.902 |
| Outpatient visits | 6,312.15 (16,218.70) | 7,475.48 (19,072.73) | -6.57 | 0.153 | 7,873.43 (18,923.58) | 9,203.24  (23,471.43) | 0.226 |
| Emergency room visits | 513.16 (1,348.10) | 765.59 (11,726.95) | -3.02 | 0.353 | 488.77 (2,996.70) | 723.99  (8,773.06) | 0.322 |
| Inpatient stays | 14,928.48 (124,719.14) | 10,738.22 (41,510.30) | 4.51 | 0.320 | 7,296.13 (33,460.39) | 9,143.72  (36,876.20) | 0.228 |
| Other medical costsb | 2,277.57 (8,701.61) | 2,014.44 (8,670.37) | 3.03 | 0.570 | 2,487.32 (8,102.39) | 2,696.77 (10,453.60) | 0.624 |
| Pharmacy costs | 6,720.76 (10,495.59) | 6,998.42 (14,297.31) | -2.21 | 0.635 | 11,475.31 (17,433.72) | 12,178.62 (18,263.42) | 0.403 |

**Notes:** Follow-up period does not include the index date. aCosts are adjusted using the annual medical care component of the Consumer Price Index to reflect inflation to year 2020. bOther medical costs may include services like independent laboratory, home health, durable medical equipment, etc. US Department of Labor, Bureau of Labor Statistics. Consumer Price Index. Medical Care. Series ID: CUUR0000SAM. Washington, DC: US Department of Labor, Bureau of Labor Statistics. http://data.bls.gov/cgi-bin/surveymost?cu.

**Abbreviations:** FF/UMEC/VI, fluticasone furoate/umeclidinium/vilanterol; HCRU, health care resource utilization; MITT, multiple-inhaler triple therapy; SD, standard deviation.

### **Supplementary Table 8.** Weighted COPD-related costs for MAPD beneficiaries

|  | **Baseline** | | | | **Follow-up** | | |
| --- | --- | --- | --- | --- | --- | --- | --- |
| **FF/UMEC/VI  (N=4,659)** | **MITT (N=9,845)** | **Robust standardized difference (%)** | **Robust p-value** | **FF/UMEC/VI  (N=4,659)** | **MITT (N=9,845)** | **Robust p-value** |
| **COPD-related health care costs ($),a mean (SD)** | | | | | | | |
| Total (medical + pharmacy) costs | 7,280.03 (15,881.25) | 7,818.38 (16,903.74) | -3.28 | 0.103 | 9,338.83 (15,486.81) | 11,510.24 (17,840.57) | <0.001 |
| Medical costs | 5,134.96 (15,684.46) | 5,663.00 (16,789.85) | -3.25 | 0.105 | 4,849.85 (15,133.68) | 5,846.06 (17,533.28) | 0.002 |
| Ambulatory | 530.52  (1,352.55) | 482.15 (1,182.47) | 3.81 | 0.067 | 549.54 (1,259.07) | 607.32 (1,484.38) | 0.029 |
| Office visits | 238.88 (314.12) | 217.34 (371.97) | 6.26 | 0.001 | 211.97 (295.00) | 212.87 (385.02) | 0.886 |
| Outpatient visits | 291.64 (1,289.66) | 264.81 (1,088.33) | 2.25 | 0.285 | 337.57 (1,182.91) | 394.45 (1,397.83) | 0.023 |
| Emergency room visits | 238.47 (897.63) | 239.51 (923.66) | -0.11 | 0.956 | 191.34 (829.32) | 189.49 (797.91) | 0.915 |
| Inpatient stays | 4,010.06 (14,980.09) | 4,630.36 (16,295.40) | -3.96 | 0.046 | 3,678.92 (14,494.80) | 4,638.38 (16,861.29) | 0.002 |
| Other medical costsb | 355.91  (927.28) | 310.98 (761.90) | 5.29 | 0.029 | 430.05 (874.82) | 410.87 (854.76) | 0.271 |
| Pharmacy costs | 2,145.07 (2,107.97) | 2,155.38 (2,112.97) | -0.49 | 0.808 | 4,488.98 (2,689.66) | 5,664.18 (3,417.09) | <0.001 |

**Notes:** Follow-up period does not include the index date. aCosts are adjusted using the annual medical care component of the Consumer Price Index to reflect inflation to year 2020. bOther medical costs may include services like independent laboratory, home health, durable medical equipment, etc. US Department of Labor, Bureau of Labor Statistics. Consumer Price Index. Medical Care. Series ID: CUUR0000SAM. Washington, DC: US Department of Labor, Bureau of Labor Statistics. http://data.bls.gov/cgi-bin/surveymost?cu.

**Abbreviations:** COPD, chronic obstructive pulmonary disease; FF/UMEC/VI, fluticasone furoate/umeclidinium/vilanterol; MAPD, Medicare Advantage with Part D; MITT, multiple-inhaler triple therapy; SD, standard deviation.

### **Supplementary Table 9.** Weighted COPD-related costs for commercial enrollees

|  | **Baseline** | | | | **Follow-up** | | |
| --- | --- | --- | --- | --- | --- | --- | --- |
| **FF/UMEC/VI  (N=821)** | **MITT (N=1,893)** | **Robust standardized difference (%)** | **Robust p-value** | **FF/UMEC/VI  (N=821)** | **MITT (N=1,893)** | **Robust p-value** |
| **COPD-related health care costs ($),a mean (SD)** | | | | | | | |
| Total (medical + pharmacy) costs | 6,948.49 (20,878.32) | 7,267.08 (21,810.38) | -1.49 | 0.778 | 9,154.07 (27,354.37) | 11,286.89 (25,997.70) | 0.088 |
| Medical costs | 4,847.03 (20,659.35) | 5,074.24 (21,713.60) | -1.07 | 0.839 | 3,753.64 (27,342.82) | 5,070.34 (25,509.85) | 0.294 |
| Ambulatory | 671.79 (1,935.57) | 676.39 (1,691.95) | -0.25 | 0.962 | 634.28 (1,883.98) | 747.40  (2,562.79) | 0.395 |
| Office visits | 245.01 (341.13) | 226.76 (320.72) | 5.51 | 0.277 | 223.95 (340.57) | 229.40 (358.70) | 0.780 |
| Outpatient visits | 426.78 (1,842.11) | 449.63 (1,601.28) | -1.32 | 0.806 | 410.33 (1,731.08) | 517.99  (2,451.40) | 0.371 |
| Emergency room visits | 51.95 (251.87) | 70.68 (333.73) | -6.33 | 0.100 | 38.13 (215.65) | 79.90  (1,132.03) | 0.123 |
| Inpatient stays | 3,968.23 (20,315.25) | 4,144.50 (21,277.61) | -0.85 | 0.873 | 2,822.41 (26,834.37) | 3,936.17  (24,627.93) | 0.347 |
| Other medical costsb | 155.05 (851.10) | 182.67 (978.66) | -3.01 | 0.409 | 258.82 (1,055.83) | 306.88 (1,441.53) | 0.328 |
| Pharmacy costs | 2,101.46 (2,221.53) | 2,192.84 (2,215.48) | -4.12 | 0.412 | 5,400.43 (2,637.17) | 6,216.55  (3,662.06) | <0.001 |

**Notes:** Follow-up period does not include the index date. aCosts are adjusted using the annual medical care component of the Consumer Price Index to reflect inflation to year 2020. bOther medical costs may include services like independent laboratory, home health, durable medical equipment, etc. US Department of Labor, Bureau of Labor Statistics. Consumer Price Index. Medical Care. Series ID: CUUR0000SAM. Washington, DC: US Department of Labor, Bureau of Labor Statistics. http://data.bls.gov/cgi-bin/surveymost?cu.

**Abbreviations:** COPD, chronic obstructive pulmonary disease; FF/UMEC/VI, fluticasone furoate/umeclidinium/vilanterol; MITT, multiple-inhaler triple therapy; SD, standard deviation.

**Supplementary Figure 1.** Weighted Kaplan–Meier analysis of time to first follow-up for any (**A**), severe (**B**), and moderate (**C** COPD exacerbation among those having any exacerbation for MAPD beneficiaries.

**
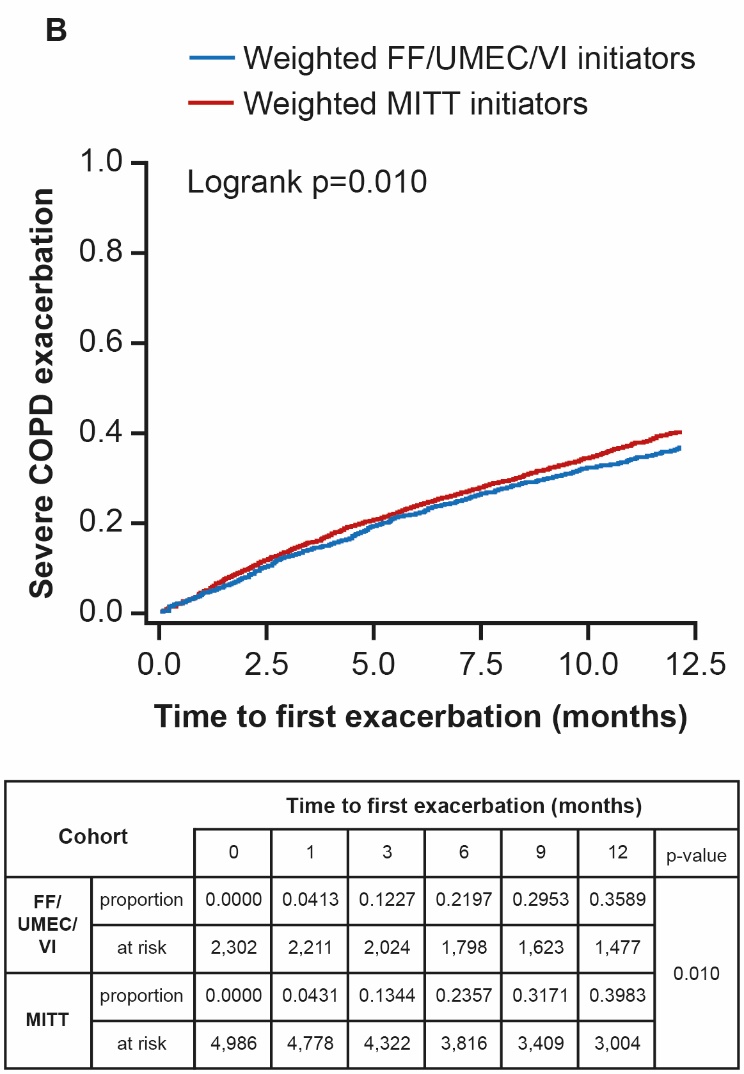

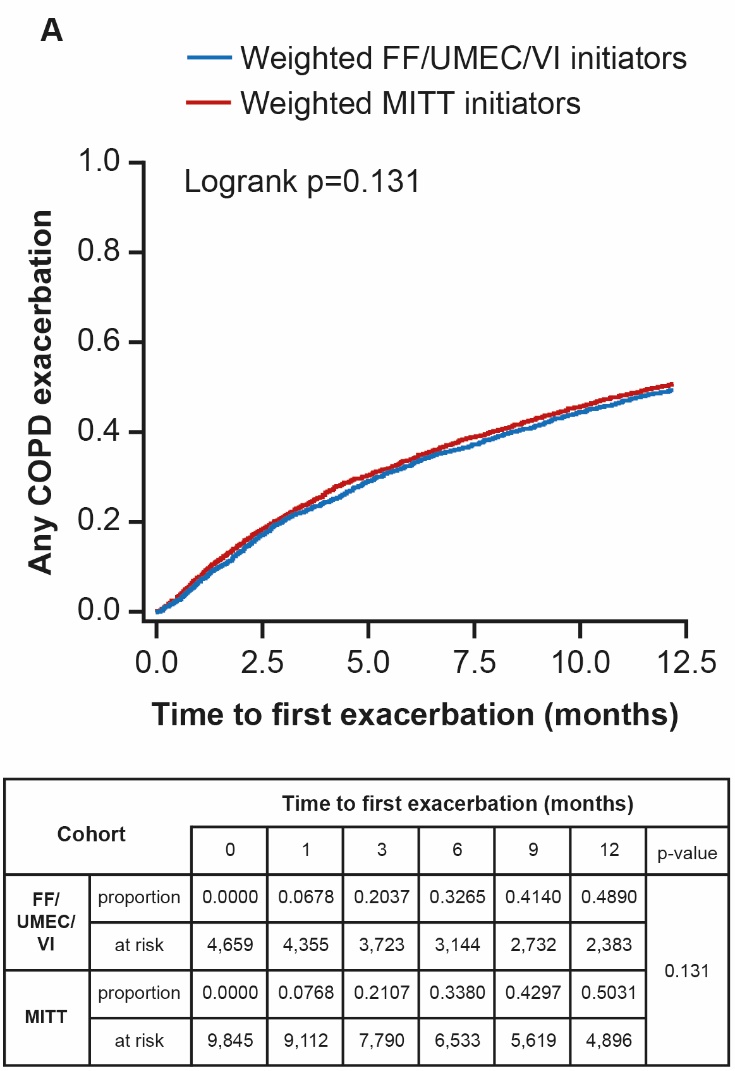

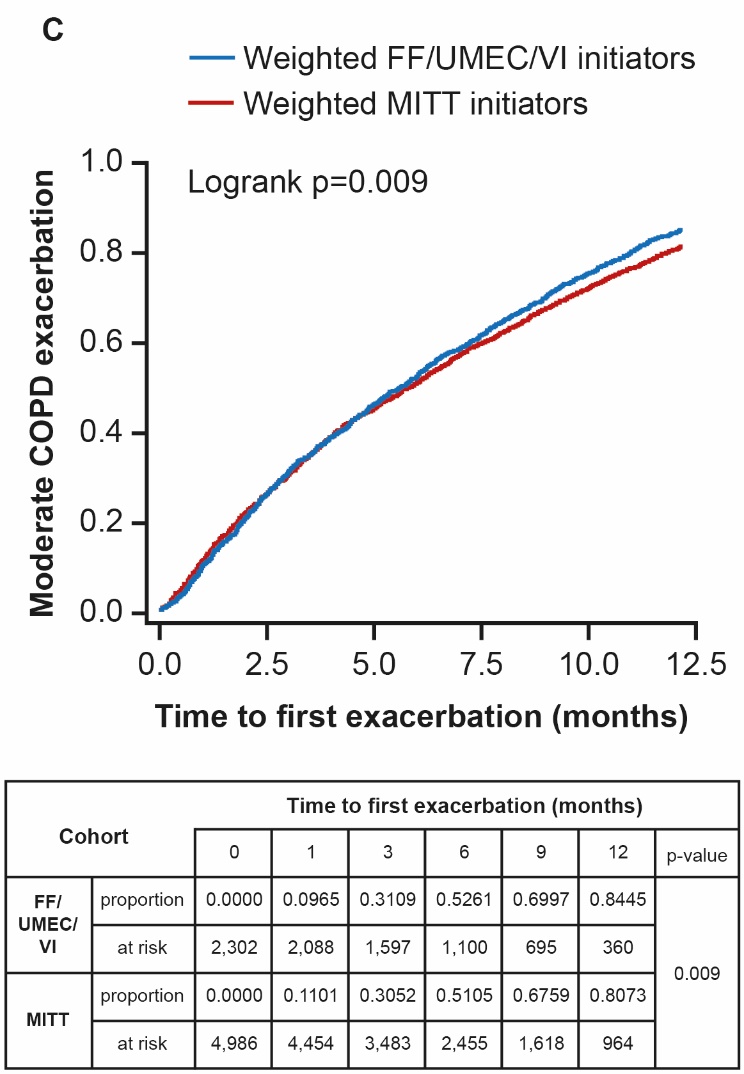
**

**Note:** Exacerbations are classified according to the highest severity contributing event. Moderate exacerbations are defined as an emergency room, physician office, or hospital outpatient visit with a primary diagnosis code of COPD accompanied by an antibiotic or systemic corticosteroid dispensing within 5 days. Severe exacerbations are defined as a hospitalization with a primary diagnosis code of COPD.

**Abbreviations:** COPD, chronic obstructive pulmonary disease; FF/UMEC/VI, fluticasone furoate/umeclidinium/vilanterol; MAPD, Medicare Advantage with Part D; MITT, multiple-inhaler triple therapy.

### **Supplementary Figure 2.** Kaplan–Meier analysis of time to first follow-up for any (**A**), severe (**B**), and moderate (**C**) COPD exacerbation for commercial enrollees.


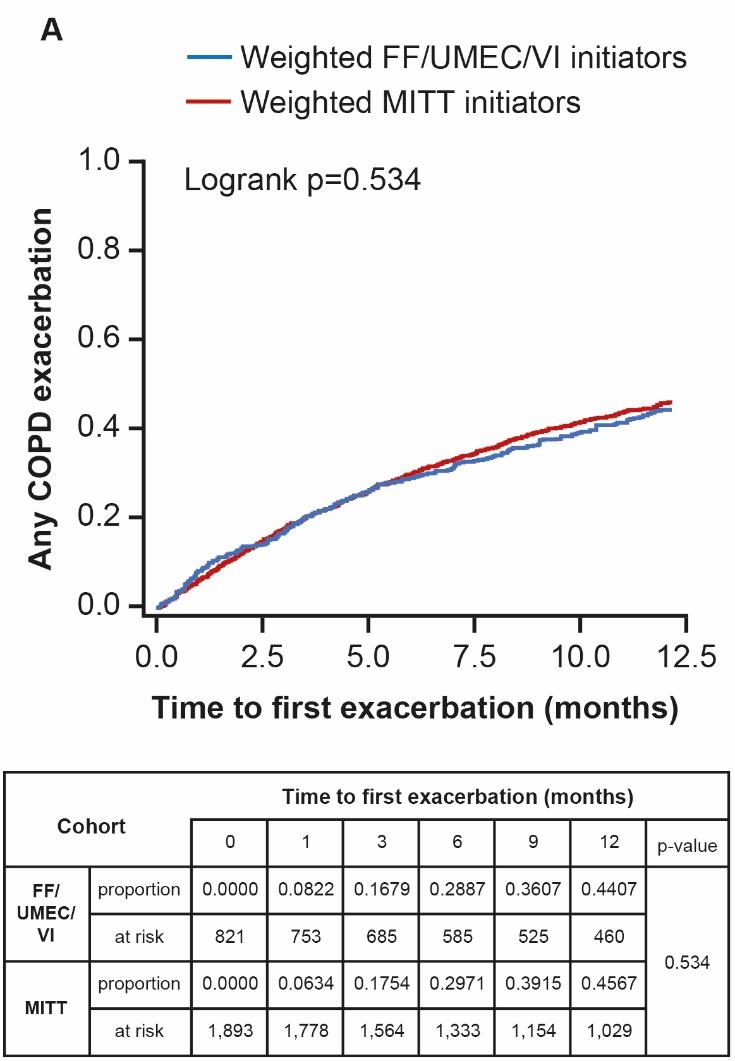


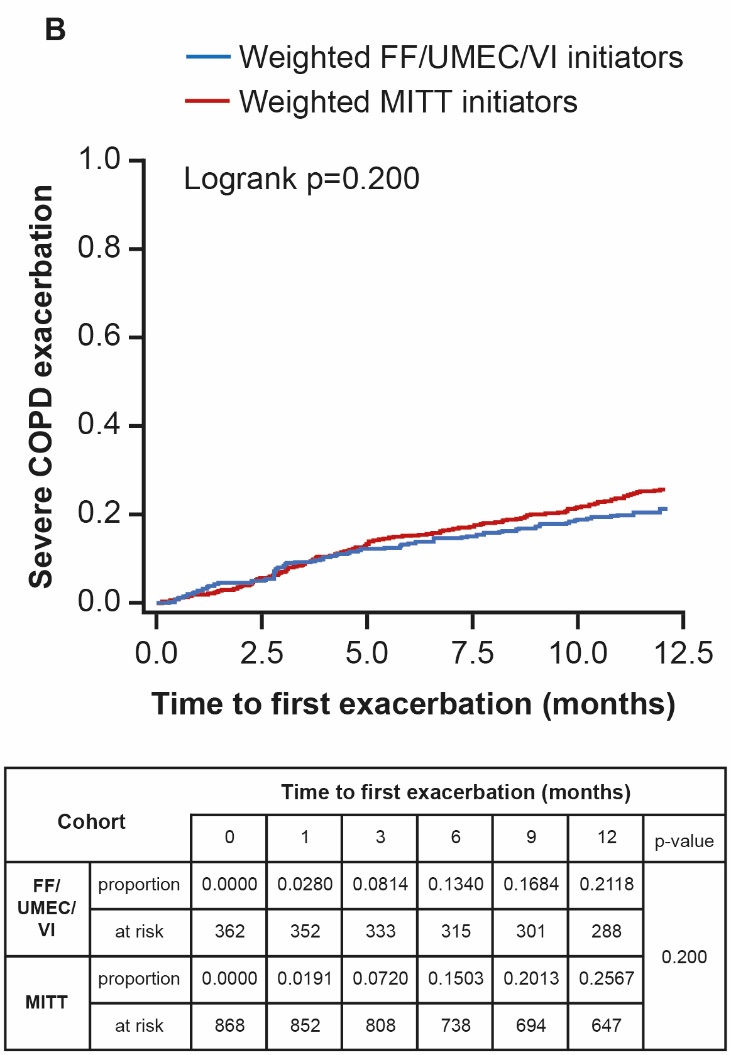

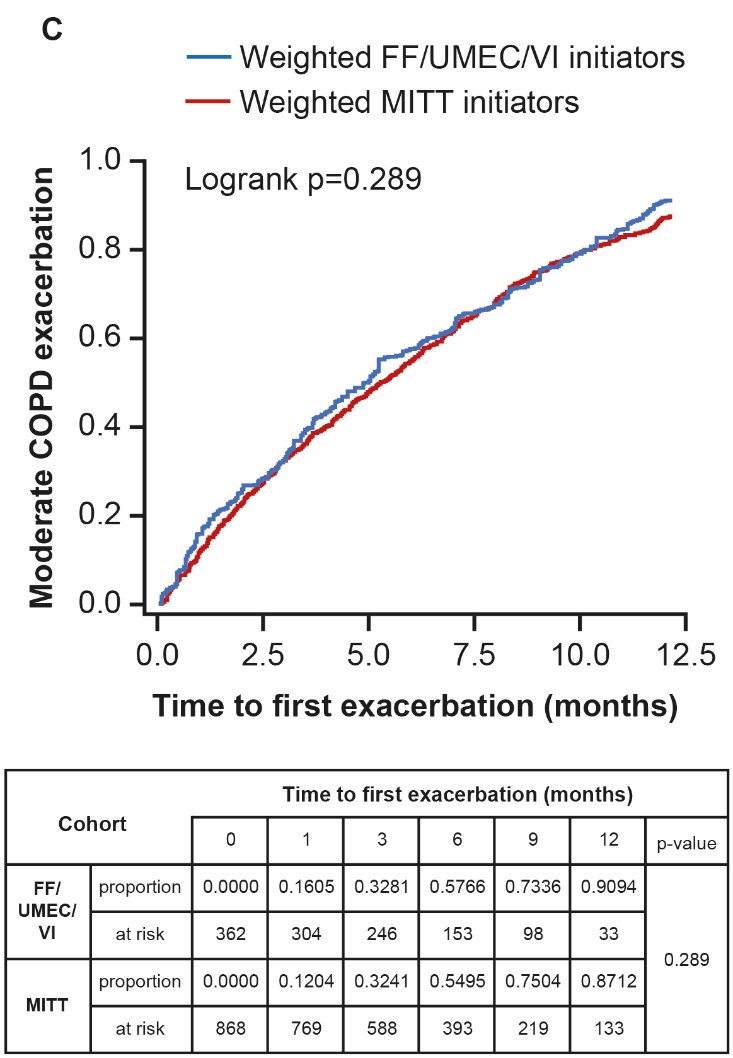


**Note:** Exacerbations are classified according to the highest severity contributing event. Moderate exacerbations are defined as an emergency room, physician office, or hospital outpatient visit with a primary diagnosis code of COPD accompanied by an antibiotic or systemic corticosteroid dispensing within 5 days. Severe exacerbations are defined as a hospitalization with a primary diagnosis code of COPD.

**Abbreviations:** COPD, chronic obstructive pulmonary disease; FF/UMEC/VI, fluticasone furoate/umeclidinium/vilanterol; MITT, multiple-inhaler triple therapy.
